# Supplementary material
Source: publisher site journal article supplement (https://www.spandidos-publications.com/4835/downloadSupplementary)
Supplement: Supplementary file 1 [file downloadSupplementary]

Figure S1. Sequencing results of the recombinant plasmid LINC01960-201 The following SNP was detected: C/G at 539 bp on NCBI (SNP number: rs11693010). In addition, the A was mutated to C at 422 bp (the non-SNP site). SNP, single nucleotide polymorphism; LINC, long intergenic non-protein coding RNA.

GATTATTACCCAGCAGTGCAGACACGCTTTCGAAGAATCGGTGGAGCTCCAGATGAATGGGTAAGTACATCAAGAGCTTCGT  
GGAGCGCGTGCTGAAGAACGAGCAGTAATTCTAGGCGATCGCTCGAGCTCTGGTCTCCTGACTCTGGCAGGGGGAACATTTG  
CACTGTTCTTGTTCCTTACCCAGGAGCTGGCCTATTGCACAACCTCAGGAAACAGCCCCTATGCAATCCTGGCCCCACAGAGC  
GGACATGTTCTGGTTTTTATTTCAGCAGCTTTTTATGAAGTGTGTTTTCCCTTCCCATCATGTCATCTGGAAGCAATTCCTCCCA  
ACAGCTGGATTGCTTTCACAATTGGTAAACACCGCGAATGGAAGGCCGGGACGATGCGGAGCTCCCCGGAGGAGCCTTGT  
CCCCACCCGCTTGGCTCGCGTCTCTGAAGCTTATCGCGGGTGCCTGCACAAGCCTCATCAAAATCGAGGGCGTCTCTCCAGCAG  
GCGACCCACATTGCATTCCCCGCTTAAGAGGGTCAACGTGTTCTTCGGGGGAGAC(422bp)ATTTCTGAATGCTTTCAGATA  
AAATTGATCAGATGCAGGCCAGATTGCCAGCTGCCGGGGCCGCTGCGCCTGTGGAGGCCCCACCAGCGCGGGGCACAGC  
GCCTCGGGGTCC(539bp)GGGGAGGCCTCTCTCTGCACCGCCGCCACCAAGCCAGTAAGAGAGGGGCAAAACCCCAAGAG  
CACTGACTGGGCCGTCAAGGAAGATGAATGCTCTCCCAAAAGTGTCTCTCGGGGACAAGTTTCCACGCAGATGCAACCGGG  
AACGCCGCCAGGCTCCGGAAGGCGAGGCCCCAGAGCGCAGCGGCCTCCAAGCGCGGGCTCAGCCTGTCGCCTCCGCAGC  
CAGGGCCCAGGAGGCCGCTCTTCGGGGTCAACCAACACGGCTCGTTCTGAGCCTAGAGGCCCAGGGCACAGTGTGAGCCGG  
AATACGGTGTAGGGGACACAGCTCAGGCCCCAGGCACTCCCTCCTGTGCGAGAAGAAATGCTGTTCTTTGATCAATGTTTCTA  
ATGTGGGAAACCAGCCGAGCAGCTGGCTGAACCTCTCGAGGGAGCACGGGTGCTGGTGAGCCCCGCTCTGATGCACAG  
AGACGCTGTGCGCAGGCTGGGGTGGGTGCAAAAGGCTTCTTCCATGCACCACCAACCTGTGGGCAGCCAGGGCCTAGC  
TCTCATGAAGGGGCTTCCAGGGCAAAGTGGGCCTCTGACTGCAACGTTCTCTGGGCAGAGATAGGCATCCTTCCCACTGC  
ACAAACAAAAGGAGACCGTCAAGGGGAGAGGCTCACCAGAGGACCCTGGTGAGGGCGACGCCCCAACTCCTCAGCACAAGG  
CTGTGCTTCTTCCATGAGCCCGTTGCTTGGGCCAGCGCGTGCAGAGTGCCTTCTCTCGCTCCCTCTGTCTGTGGGCC  
CTCCTCTCTCTCCCTCCAGCCTGGTGGAAGCTTATCTCTGTCGGGGCCAGAGGACAGAACTACATCATACATTTTCCCGT  
GCGTCATGTTATCTTGCTTGAATTTTGAAAATCTGTGAGTTTCTGGTTTTTCCATGGCAAGGCTCATCTCCAGACCTTAGT  
CACTCTGCTCTGGCTGCCTGGACTGCTAGAGAGGGGCCTCAGGGCGCACCTGGAGAAATCACTGGGGCCAGGTCAGAGG  
GATGGGTGGGTGAGAGCAACCCCTTCTTAATAGTTCAAAATGGCCCTCTGGCTTAAAGAGACCGAAGCCACGTAACAACCA  
AATGCAATGTGTGGGCCGTGTTGGATCCTGATTCAAAACAAACCAACTGGAAGAGGAGATTTGGGGATAATCAGGAAGATT  
GAATTGGGACTGCGTAGCAGAAAATAGCAAGAATTATTGTTAATTTGATATGTGCGATAATGGTGTGGTAGTTATAGAAGAA  
AACATGCTTATCTTTAAATGGGTATATTAAAGTATTTAAGGGTGAAATATAAGCGGCCGTGGCCGCAATAAAATATCTTTATT  
TTCATACATCTGTGTGTGAAACCCCTAAAAAATCACCCGGCGTACACGC

Figure S2. Sequencing results of the recombinant plasmid ADAMTS7. The following SNPs exist: C/T at 42 bp on NCBI (SNP number: rs1045130). SNP, single nucleotide polymorphism; ADAMTS7, a disintegrin and metalloproteinase with thrombospondin motifs 7.

GGCTTTTAGGGCAGGAGGAGCTCCAGATGAATGGG  
TAAGTACATCAAGAGCTTCGTGGAGCGCGTGCTGA  
AGAACGAGCAGTAATTCTAGGCGATCGCTCGAGCT  
GCGCCAGGATGCACAGACCGACCGACAGACCTCA  
GTGCC**T(42bp)**ACCACGGGCTGTGGCGGAGCTCCCG  
CCCCCTGCGCCCTAATGGTGCTAACCCCTCTCACT  
ACCCAGCAGCAGGCTGGGGACCTCCTCCCCCTCAA  
AAAAGGTATTTTTTTTATTCTAACAGTTTGTGTAACA  
TTTATTATGATTTTACATAAATGAGCATCTACCATTC  
CAAAGCAGCGGCCGCTGGCCGCAATAAAATATCTT  
TATTTTCATTACATCTGTGTGTTGAAAAACCCCG
